# Supplementary material for: A new species of the Asian music frog genus Nidirana (Amphibia, Anura, Ranidae) from Southwestern China
Source: PeerJ journal article supplement (doi:10.7717/peerj.7157), 2019-07-04
Supplement: Table_S1.xlsx [file Table_S1.xlsx]

## Sheet: Sheet1
Table S1 Measurements of the adult specimens of Nidirana leishanensis sp. nov. and N. hainanensis. Unit: mm. See abbreviations for the morphometric measurements in Methods section.
Species	Voucher number	Locality	Sex	SVL	HDL	HDW	SL	IND	IOD	UEW	ED	TYD	LAL	LW	HAL	HLL	TL	TW	TFL	FL
Nidirana hainanensis	CIB64III3345	Diaoluo Mountain, Lingshui County, Hainan Province, China	male	33.4	12.7	12	5.5	3.9	3.6	3.1	4.5	4.3	15.1	2	9.1	59	18.9	4.5	27.1	18.5
Nidirana hainanensis	CIB64III3346	Diaoluo Mountain, Lingshui County, Hainan Province, China	male	33.3	12.9	11.5	5.3	3.5	3.5	3.1	5	3.8	14.8	2.5	9	58	18.4	4.8	26.3	18.7
Nidirana hainanensis	CIB64III3347	Diaoluo Mountain, Lingshui County, Hainan Province, China	male	33.5	12.7	12.5	5.5	4.4	3.4	3.1	4.5	3.6	15.1	2.9	9.7	61	19.4	5.4	27.7	18.8
Nidirana hainanensis	CIB64III3348	Diaoluo Mountain, Lingshui County, Hainan Province, China	male	32.8	12.7	12	5.7	4.4	3.7	3.1	4.4	3.9	14.9	2.4	9	58	17.6	4.7	26.1	18.8
Nidirana leishanensis sp. nov.	CIBLS20170727002	Leigong Mountain, Leishan County, Guizhou Province, China	male	55.8	21.9	20.1	8	6.3	4.4	4.5	6.3	4.7	24.9	5.9	14.9	97.4	29.9	8.6	45.6	32.3
Nidirana leishanensis sp. nov.	CIBLS20150628001	Leigong Mountain, Leishan County, Guizhou Province, China	male	55.7	20.3	19.6	7.4	6.5	4	4	7	4.7	24	4.4	14.7	92.7	30.6	8.6	42	31
Nidirana leishanensis sp. nov.	CIBLS20150628002	Leigong Mountain, Leishan County, Guizhou Province, China	male	49.5	18.4	17.5	7.3	5.6	4.2	3.7	6.3	4.7	20.6	4.5	12.5	82.2	27.3	7.3	37	27.3
Nidirana leishanensis sp. nov.	CIBLS20150628005	Leigong Mountain, Leishan County, Guizhou Province, China	male	53	20	19.3	8	6.4	4.5	4.3	6.1	5.1	24	4.7	12.6	87	29.6	7.7	42.6	30.7
Nidirana leishanensis sp. nov.	CIBLS20150628006	Leigong Mountain, Leishan County, Guizhou Province, China	male	56.4	23.7	22.2	8.5	6.7	4.7	4.3	6.6	5.6	25.3	5.2	15.2	93.1	31.5	8.6	46.5	34.6
Nidirana leishanensis sp. nov.	CIBLS20150628007	Leigong Mountain, Leishan County, Guizhou Province, China	male	49.6	18.7	18	7	5.7	4.3	4.3	6	5	21.6	4.5	12.8	83.5	26.1	7.3	38.7	28.2
Nidirana leishanensis sp. nov.	CIBLS20150627003	Leigong Mountain, Leishan County, Guizhou Province, China	female	53.6	18.7	17.6	7.7	6.7	5	3.5	6	5.6	22.4	4	14.2	88	28	7	40.8	29.5
Nidirana leishanensis sp. nov.	CIBLS20150627001	Leigong Mountain, Leishan County, Guizhou Province, China	female	55.3	19.3	19.3	8.4	6.9	5.2	4.4	6.2	4.8	23.7	4.1	14.9	92.7	31.2	8.3	42.4	32.4
Nidirana leishanensis sp. nov.	CIBLS20150627002	Leigong Mountain, Leishan County, Guizhou Province, China	female	43.7	17	16.5	6.7	5.6	3.8	3.2	5.2	4	19.8	4.3	12	79	25.2	6.3	37.3	26.3
Nidirana leishanensis sp. nov.	CIBLS20170727001	Leigong Mountain, Leishan County, Guizhou Province, China	female	48.1	17.2	17	7.3	6.1	3.9	4	5.8	4.4	21.9	4.4	13.6	85.2	27	7.12	39.2	29.4
