# Supplementary material for: A new species of the Asian music frog genus Nidirana (Amphibia, Anura, Ranidae) from Southwestern China
Source: PeerJ journal article supplement (doi:10.7717/peerj.7157), 2019-07-04
Supplement: Table_S2.docx [file Table_S2.docx]

**Table S2** Measurements of the tadpoles of *Nidirana leishanensis* sp. nov.. Unit: mm. See abbreviations for the morphometric measurements in Methods section.

| **Voucher number** | **TOL** | **SVL** | **BH** | **BW** | **SS** | **SL** | **MW** | **TAL** | **TH** | **TBW** | **Stage** |
| --- | --- | --- | --- | --- | --- | --- | --- | --- | --- | --- | --- |
| CIBLS20180826001 | 31.5 | 9.9 | 3.9 | 5.1 | 6.5 | 2.9 | 2.0 | 23.0 | 4.1 | 2.4 | 26 |
| CIBLS20180826002 | 25.4 | 8.8 | 3.5 | 4.7 | 5.5 | 2.8 | 1.8 | 17.1 | 3.9 | 2.1 | 25 |
| CIBLS20180826003 | 22.5 | 8.1 | 3.3 | 4.0 | 4.2 | 2.3 | 1.4 | 15.5 | 3.8 | 1.9 | 25 |
| CIBLS20180826004 | 28.0 | 9.0 | 3.8 | 4.7 | 5.8 | 2.5 | 1.8 | 18.8 | 3.9 | 2.3 | 25 |
| CIBLS20180826005 | 25.2 | 8.6 | 3.4 | 4.7 | 5.3 | 2.7 | 1.9 | 15.3 | 3.6 | 2.0 | 25 |
| CIBLS20180826006 | 40.4 | 12.2 | 4.8 | 7.1 | 9.2 | 4.8 | 2.7 | 26.8 | 6.6 | 3.6 | 32 |
| CIBLS20180826007 | 38.3 | 12.4 | 4.1 | 6.2 | 7.4 | 3.8 | 2.4 | 24.4 | 5.2 | 3.2 | 31 |
