# Supplementary material for: A new species of the Asian music frog genus Nidirana (Amphibia, Anura, Ranidae) from Southwestern China
Source: PeerJ journal article supplement (doi:10.7717/peerj.7157), 2019-07-04
Supplement: Table_S3.docx [file Table_S3.docx]

**Table S3** Primers used in this study.

| Gene | Idengtifier | Sequence (5' to 3') | Source |
| --- | --- | --- | --- |
| 12S rRNA | P1 | CCAGGCTTTACACTTTATGC | Kocher *et al.*, 1989 |
| P2 | GCGATTAAGTTGGGTAACGC |
| 16S rRNA | P7 | CGCCTGTTTACCAAAAACAT | Simon *et al.*, 1994 |
| P8 | CCGGTCTGAACTCAGATCACGT |
| COI | Chmf4 | TYTCWACWAAYCAYAAAGAYATCGG | Che *et al.,* 2012 |
| Chmr4 | ACYTCRGGRTGRCCRAARAATCA |
| CXCR4 | CXCR4-B | ATCATTGGCAATGGAYTRGT | Biju & Bossuyt, 2003 |
| CXCR4-G | AGGCAACAGTGGAARAANGC |
| Tyr1 | Tyr1A | AGGTCCTCTTRAGCAAGGAATG | Bossuyt & Milinkovitch, 2000 |
| Tyr 1G | TGCTGGGCRTCTCTCCARTCCCA |
